# Supplementary material
Source: publisher figshare collection journal article supplement (https://springernature.figshare.com/ndownloader/files/22044711)
Supplement: Supplementary file [file 22044711]

**Additional file 1:** Body weight and health related quality of life (QOL) at baseline and at 3-month follow-up in Danish patients treated for head and neck cancer who participated in a multidisciplinary residential nutritional rehabilitation programme<sup>a</sup>.

|                                        | Baseline   | 3-month follow-up | p-value <sup>b</sup> |
|----------------------------------------|------------|-------------------|----------------------|
| <b>Body weight (n=34)</b>              | 65.0 ±15.1 | 66.0 ±15.5        | 0.042*               |
| <b>EORTC QLQ-C30</b>                   |            |                   |                      |
| <b>Global health status/QOL (n=32)</b> | 59.4 ±22.7 | 58.1 ±19.8        | 0.558                |
| <b>Functional scales</b>               |            |                   |                      |
| - Physical functioning (n=32)          | 77.5 ±16.7 | 82.7 ±13.2        | 0.038*               |
| - Role functioning (n=32)              | 68.8 ±26.4 | 72.9 ±27.7        | 0.312                |
| - Emotional functioning (n=32)         | 65.4 ±21.6 | 71.9 ±22.7        | 0.154                |
| - Cognitive functioning (n=32)         | 72.4 ±21.8 | 75.0 ±25.8        | 0.233                |
| - Social functioning (n=31)            | 68.8 ±25.0 | 76.9 ±16.7        | 0.210                |
| <b>Symptom scales/items</b>            |            |                   |                      |
| - Fatigue (n=32)                       | 42.0 ±23.2 | 41.3 ±25.1        | 0.719                |
| - Nausea and vomiting (n=32)           | 13.0 ±18.8 | 7.3 ±11.9         | 0.066                |
| - Pain (n=32)                          | 25.5 ±26.1 | 28.1 ±27.3        | 0.382                |
| - Dyspnoea (n=32)                      | 20.8 ±30.2 | 15.6 ±25.4        | 0.195                |
| - Insomnia (n=32)                      | 36.5 ±27.3 | 32.3 ±32.2        | 0.194                |
| - Appetite loss (n=31)                 | 47.3 ±35.3 | 36.6 ±31.5        | 0.054                |
| - Constipation (n=32)                  | 14.6 ±22.3 | 11.5 ±16.1        | 0.366                |
| - Diarrhoea (n=32)                     | 14.6 ±20.6 | 11.5 ±23.4        | 0.432                |
| - Financial difficulties (n=32)        | 10.4 ±17.9 | 11.5 ±24.8        | 0.948                |
| <b>EORTC QLQ-H&amp;N35</b>             |            |                   |                      |
| <b>Symptom scales/items</b>            |            |                   |                      |
| - Pain (n=31)                          | 31.7 ±22.8 | 28.2 ±24.4        | 0.760                |
| - Swallowing (n=30)                    | 35.8 ±23.4 | 30.0 ±24.3        | 0.034*               |
| - Sensory problems (n=31)              | 35.5 ±25.7 | 30.6 ±25.1        | 0.059                |
| - Speech problems (n=31)               | 22.2 ±21.1 | 15.4 ±16.4        | 0.016*               |
| - Trouble with social eating (n=30)    | 47.8 ±31.3 | 38.4 ±27.3        | 0.010*               |
| - Trouble with social contact (n=30)   | 12.9 ±15.4 | 11.8 ±17.1        | 0.508                |
| - Less sexuality (n=26)                | 37.2 ±38.7 | 33.3 ±36.2        | 0.873                |
| - Teeth (n=30)                         | 42.2 ±36.0 | 41.1 ±39.8        | 0.873                |
| - Opening mouth (n=30)                 | 25.6 ±32.4 | 27.8 ±35.1        | 0.964                |
| - Dry mouth (n=31)                     | 73.1 ±29.1 | 71.0 ±30.7        | 0.629                |
| - Sticky saliva (n=30)                 | 51.1 ±36.9 | 50.0 ±35.8        | 0.719                |
| - Coughing (n=31)                      | 31.2 ±29.7 | 31.2 ±33.3        | 0.992                |
| - Felt ill (n=31)                      | 21.5 ±20.3 | 23.7 ±27.5        | 0.392                |
| - Pain killers (n=31)                  | 51.6 ±50.8 | 38.7 ±49.5        | 0.103                |
| - Nutritional supplements (n=30)       | 33.3 ±47.9 | 40.0 ±49.8        | 0.527                |
| - Feeding tube (n=28)                  | 25.0 ±44.1 | 10.7 ±31.5        | 0.046*               |
| - Weight loss (n=29)                   | 41.4 ±50.1 | 20.7 ±41.2        | 0.014*               |
| - Weight gain (n=27)                   | 22.2 ±42.4 | 33.3 ±48.0        | 0.257                |

<sup>a</sup> Only participants with both a baseline and a follow-up measurement of the given variable were included in the analyses and thus in the table. The included numbers of participants are presented for each variable.

<sup>b</sup> Differences between body weight at baseline and follow up were tested using a two-sided paired t-test while differences between QOL scores at baseline and follow-up were tested using the Wilcoxon sign rank test.

\*p<0.05

Data are presented as mean values and standard deviations. The European Organization for Research and Treatment of Cancer's (EORTC) QLQ-C30 and QLQ-H&N35 were used to assess QOL. All scales and single-item measures range in score from 0 to 100. A high score represents a higher response level. Thus a high score for a functional scale or global QOL represents a high level of functioning/QOL whereas a high score on a symptom scale represents a high level of symptoms.
